# Supplementary material
Source: PubMed Central journal article supplement (PMC5179939)

## SUPPLEMENTARY MATERIAL

### TABLES

**Table S1.** List of candidate variants (SNVs). This list resulted after a prioritization process obtained with the different bioinformatics tools described in Materials and Methods. Positions are related to the “Genome Reference Consortium GRCh37”. NR = not reported.

| <b>CHR</b> | <b>POS</b> | <b>GENE</b>         | <b>PAVAR</b> | <b>PHEVOR</b> | <b>EXOMISER</b> | <b>MAF</b> |
|------------|------------|---------------------|--------------|---------------|-----------------|------------|
| <b>16</b>  | 23999898   | <b>PRKCB</b>        | 6            | 10            | 1               | NR         |
| <b>16</b>  | 46991017   | DNAJA2              | 6            | 10            | 0.86            | 0.0001     |
| <b>2</b>   | 37586852   | QPCT                | 7            | 8             | 0.81            | 0.0006     |
| <b>2</b>   | 15615887   | NBAS                | 6            | 33            | 1               | NR         |
| <b>6</b>   | 151161707  | PLEKHG1/<br>MTHFD1L | 6            | 23            | 0               | 0.0002     |
| <b>7</b>   | 102952524  | PMPCB/<br>SLC26A5   | 7            | 14            | 0               | NR         |
| <b>13</b>  | 86368804   | SLITRK6             | 6            | 6             | 0.86            | 4.15E-05   |
| <b>17</b>  | 64738865   | PRKCA               | 7            | 16            | 1               | NR         |

**Table S2.** Protein coding transcripts of the PRKCB human gene. Annotated protein coding transcripts of the PRKCB human gene with their Ensembl IDs (<http://www.ensembl.org/index.html>).

| <b>Name</b>      | <b>Transcript ID</b> | <b>Bp</b> | <b>Protein</b> |
|------------------|----------------------|-----------|----------------|
| <b>PRKCB-002</b> | ENST00000303531      | 7969      | 673aa          |
| <b>PRKCB-001</b> | ENST00000321728      | 2689      | 671aa          |
| <b>PRKCB-010</b> | ENST00000466124      | 536       | 122aa          |
| <b>PRKCB-007</b> | ENST00000472066      | 556       | 130aa          |
| <b>PRKCB-003</b> | ENST00000498058      | 480       | 57aa           |
| <b>PRKCB-004</b> | ENST00000498739      | 569       | 119aa          |

**Table S3. Summary table for image analysis data (Mean Density (MD) / Area ( $\mu\text{m}^2$ )  $\pm$  SEM)**

| Cochlear Turns     | Apical MD $\pm$ SEM | N  | Middle MD $\pm$ SEM | N  | Basal MD $\pm$ SEM | N  | Average MD $\pm$ SEM | N  | Areas |
|--------------------|---------------------|----|---------------------|----|--------------------|----|----------------------|----|-------|
| Inner Border Cells | 88.75 $\pm$ 3.522   | 3  | 90.2 $\pm$ 0.262    | 12 | 80.78 $\pm$ 0.177  | 3  | 88.39 $\pm$ 0.2688   | 18 | 929   |
| Inner Hair Cells   | 47.37 $\pm$ 0.524   | 6  | 26.90 $\pm$ 0.298   | 17 | 19.57 $\pm$ 0.234  | 6  | 27.91 $\pm$ 0.3225   | 29 | 5335  |
| Outer Hair Cell 1  | 41.63 $\pm$ 1.198   | 5  | 77.84 $\pm$ 1.323   | 10 | 48.49 $\pm$ 1.312  | 6  | 60.83 $\pm$ 1.290    | 21 | 1584  |
| Outer Hair Cell 2  | 38.69 $\pm$ 1.110   | 5  | 42.89 $\pm$ 1.218   | 7  | 51.52 $\pm$ 1.156  | 7  | 44.96 $\pm$ 1.1665   | 19 | 1467  |
| Outer Hair Cell 3  | 37.10 $\pm$ 1.248   | 5  | 31.46 $\pm$ 1.080   | 5  | 56.94 $\pm$ 1.426  | 8  | 44.35 $\pm$ 1.2805   | 18 | 1439  |
| OHCs               | 39.14 $\pm$ 0.381   | 15 | 56.18 $\pm$ 0.407   | 22 | 52.72 $\pm$ 0.415  | 21 | 50.52 $\pm$ 0.4031   | 58 | 4490  |
| Deiter Cell 1      | 25.45 $\pm$ 0.707   | 1  | 88.19 $\pm$ 1.571   | 11 | 50.05 $\pm$ 1.266  | 8  | 69.80 $\pm$ 1.4058   | 20 | 3604  |
| Deiter Cell 2      | 34.28 $\pm$ 0.764   | 3  | 47.36 $\pm$ 1.077   | 10 | 66.10 $\pm$ 1.242  | 10 | 53.80 $\pm$ 1.1079   | 23 | 4058  |
| Deiter Cell 3      | 35.01 $\pm$ 1.030   | 1  | 30.06 $\pm$ 0.781   | 9  | 61.87 $\pm$ 1.502  | 9  | 45.39 $\pm$ 1.1354   | 19 | 3563  |
| DCs                | 32.66 $\pm$ 0.270   | 5  | 57.14 $\pm$ 0.378   | 30 | 59.93 $\pm$ 0.430  | 27 | 56.38 $\pm$ 0.3921   | 62 | 11225 |
| Tectal Cells       | 61.67 $\pm$ 1.733   | 4  | 50.31 $\pm$ 1.756   | 8  | 12.22 $\pm$ 0.781  | 3  | 45.72 $\pm$ 1.5547   | 15 | 1408  |

**Crista**

|                    | MD $\pm$ SEM     | N | Areas |
|--------------------|------------------|---|-------|
| Vestibular SE - P  | 2.81 $\pm$ 0.103 | 4 | 6949  |
| Vestibular SE - C  | 3.53 $\pm$ 0.153 | 2 | 4868  |
| Vestibular SE      | 3.05 $\pm$ 0.120 | 6 | 11817 |
| Transitional Epith | 5.86 $\pm$ 0.238 | 4 | 2761  |
| Dark Cell Epith    | 4.93 $\pm$ 0.225 | 3 | 1112  |

| <b>t-tests</b> |               |                 |                    |
|----------------|---------------|-----------------|--------------------|
| IBCs vs IHCs   | p < 0.0000005 | VSE vs TE       | p < 0.0125         |
| IBCs vs OHCs   | p < 0.0001    | VTE&DCE vs IBCs | p < 0.00000008     |
| IBCs vs TCs    | p < 0.00015   | VTE&DCE vs TCs  | p < 0.000014       |
| aIHCs vs bIHCs | p < 0.0809    | VSE vs IHCs     | p < 0.0000013      |
| IHCs vs OHCs   | p < 0.0053    | VSE vs OHCs     | p < 0.000000000076 |
| aDCs vs mDCs   | p < 0.0227    | VSE vs IBCs     | p < 0.00000000083  |
| aDCs vs bDCs   | p < 0.005     | VSE vs TCs      | p < 0.000025       |
| aTCs vs bTCs   | p < 0.0012    |                 |                    |
| mTCs vs bTCs   | p < 0.0049    |                 |                    |

Values are given as Mean  $\pm$  SEM, *N*s are the number of measurements for each cell type or region. *t*-tests with significant values comparing differences between cell types or regions are given in box at lower right. Other comparisons were non-significant. *Table Abbreviations*: IBCs, inner border cells; IHC, inner hair cell; OHC, outer hair cell; DCs, Deiters cells; TCs, tectal cells; *a*, *m*, *b*, apical, middle and basal cochlear turns; SE, sensory epithelium; VSE, vestibular sensory epithelium; C, vestibular central zone; P, vestibular peripheral zone; TE, transitional epithelium; DCE, dark cell epithelium.

**Table S4. PKCB-related signaling pathways**

| <b>Top Signaling Pathways</b>  | <b>Fisher's Exact Test</b> | <b>Ratio</b> | <b>z-score</b> | <b>Molecules</b>                                                                                                                                                                                          |
|--------------------------------|----------------------------|--------------|----------------|-----------------------------------------------------------------------------------------------------------------------------------------------------------------------------------------------------------|
| Axonal Guidance Signaling      | p < 0.0000189              | 0.06         | NaN            | DPYSL2, ADAM22, FZD10, ECEL1, WNT3, MYL2, PDGFC, TUBB2B, NTNG1, TUBA8, NGFR, UNC5D, PRKAR1B, ADAM23, ABLIM2, ROBO2, SEMA3E, TUBB3, TUBB2A, L1CAM, EPHA3, GNG3, SEMA3A, ADAMTS6, PAK3, LINGO1, GNAL, PRKCB |
| $\alpha$ -Adrenergic Signaling | p < 0.00232                | 0.09         | 1.89           | CAMK4, PYGM, ADCY1, PRKAR1B, SLC8A2, PYGL, GNG3, PRKCB                                                                                                                                                    |
| 14-3-3-mediated Signaling      | p < 0.0136                 | 0.07         | 2              | TUBB3, YWHAG, TUBA8, TUBB2A, MAPK10, VIM, TUBB2B, PRKCB                                                                                                                                                   |
| CXCR4 Signaling                | p < 0.0216                 | 0.06         | 1.89           | RHOV, MYL2, RND3, PAK3, ADCY1, MAPK10, GNG3, GNAL, PRKCB                                                                                                                                                  |

## FIGURES

**Figure suppl.1.** Pipeline of the workflow with the number of variants filtered out at each stage. The first step is to identify common variants to all cases. After this, we filtered out variants by using our in-house control database and  $MAF < 0.001$ . We scored SNVs using a seven point scoring system (Pathogenic Variant or PAVAR score), according to the effect on protein structure and phylogenetic conservation: (SIFT (Sort Intolerant from Tolerant), PolyPhen2 (Polymorphism Phenotyping v2), Grantham's Matrix, GERP+ (Genomic Evolutionary Rate Profiling), Mutation taster, PhastCons and PhyloP); and we keep SNVs with a score  $> 5$ . Finally, we take into account another bioinformatics tools that include phenotype information such as Exomiser v2 and Variant Annotation Analysis and Search Tool (VAAST) + Phevor to select the best candidate probably pathogenic SNV.

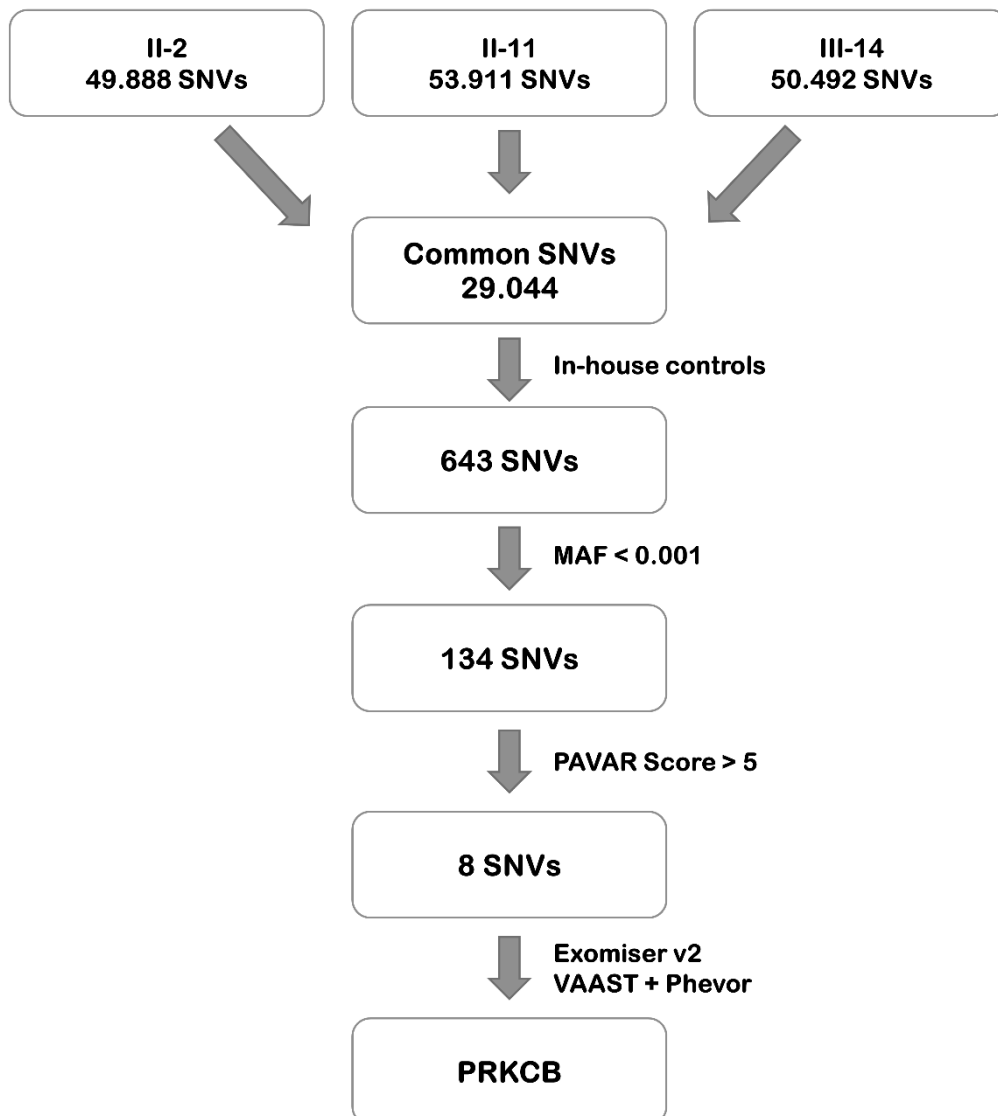

**Figure suppl.2.** qPCR of PRKCB in human cochlea and semicircular canals (SC). **(A)** Validation of the expression using primers for PRKCB (246bp) and a housekeeping gene, HPRT1 (92bp). **(B)**  $\Delta C_t$  values ( $\Delta C_t$  cochlea =  $2.83 \pm 0.40$ ;  $\Delta C_t$  sc =  $2.49 \pm 0.38$ ) calculated after performing qPCR using SYBR® Green RT-PCR techniques.

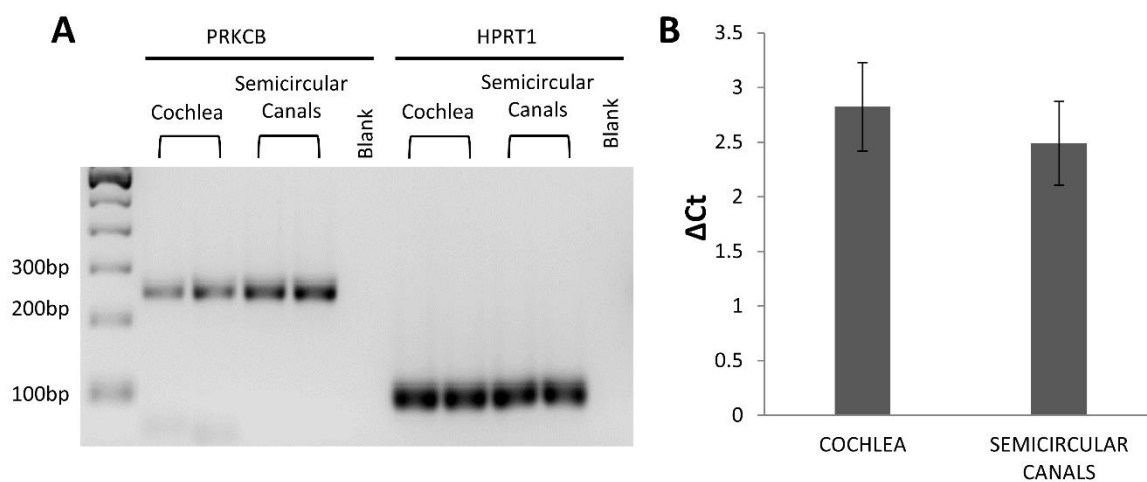

**Figure suppl.3.** Image analysis, cochlear example. In this confocal section from the basal turn of the cochlea, individual cochlear cells of different types were traced and the mean density/area measured in ImageJ. Cell nuclei were defined in all cells in which they could be distinguished and their densities were individually subtracted from each cell's total density to obtain a more homogeneous measurement across cell types. The intensity scale in the top upper right of the figure shows mean density levels from 0 to 255. Scale bar = 20  $\mu\text{m}$ .

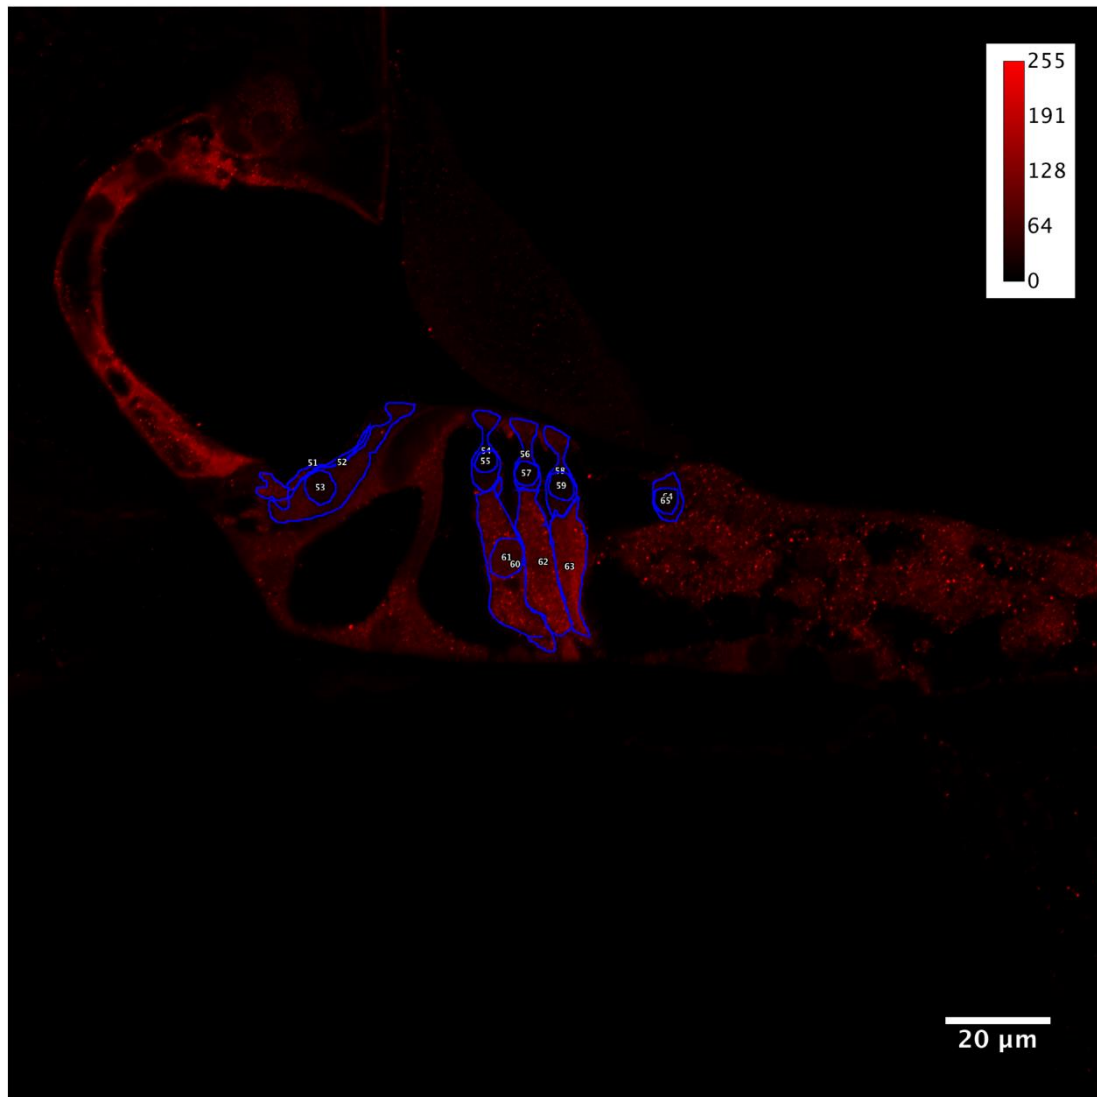

**Figure suppl.4.** Image analysis, vestibular example. In this confocal section from a vestibular crista ampullaris, individual regions (VSEc, VSEp, TE and DCE) were traced and the mean density/area measured in ImageJ. Individual hair cells or supporting cells could not be distinguished because their overall intensity levels were so dim and their borders were indistinct. Cell nuclei were defined in all cells in which they could be distinguished and their densities were subtracted in aggregate from the region's total density to obtain more homogeneous measurements across regions. The intensity scale in the top upper right of the figure shows mean density levels from 0 to 255. Scale bar = 20  $\mu\text{m}$ .

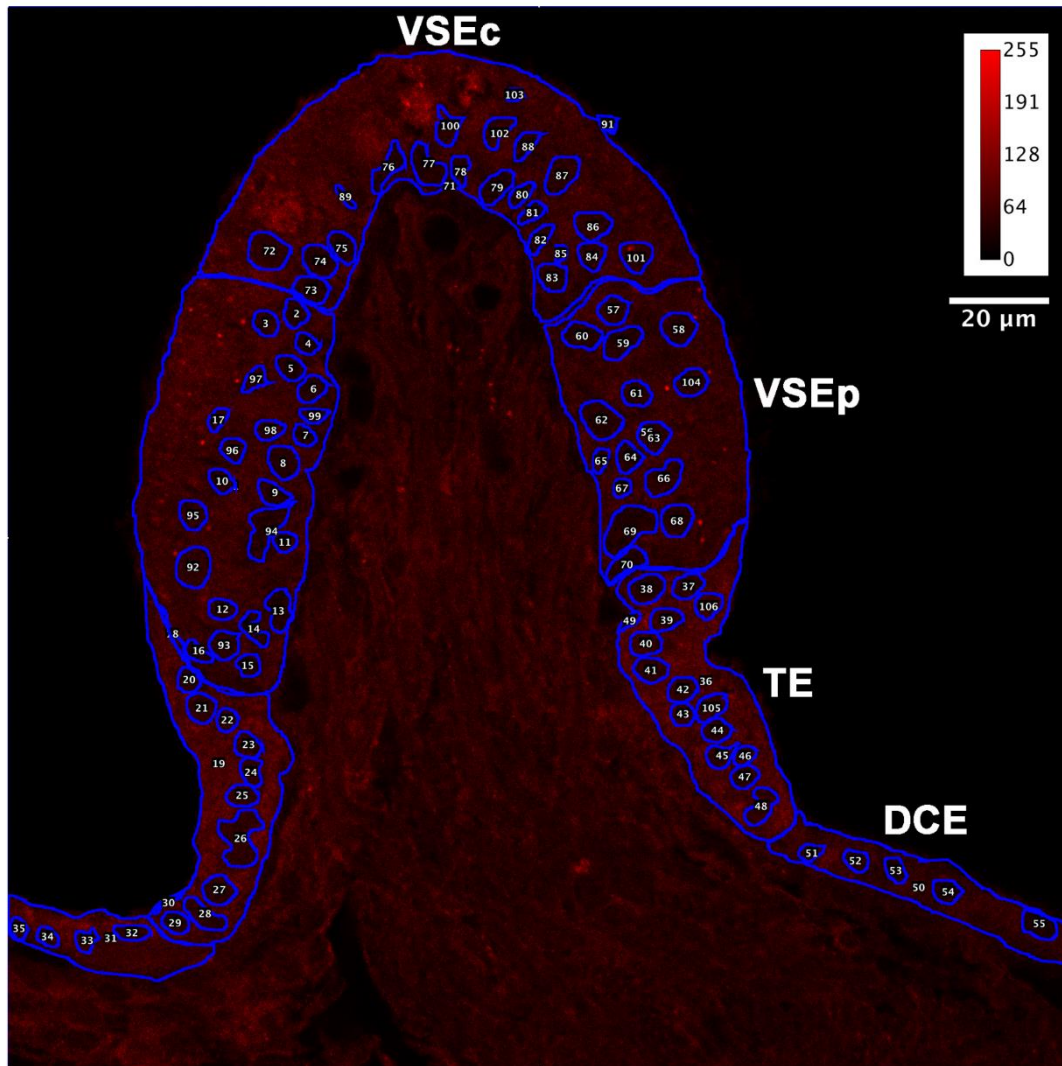

Supplement: supp_ddw183_SUPPLEMENTARY_MATERIAL.pdf [file supp_ddw183_SUPPLEMENTARY_MATERIAL.pdf]
